# Supplementary material
Source: MDPI journal article supplement (https://www.mdpi.com/2297-8739/11/4/101)
Supplement: s1 [file s1]

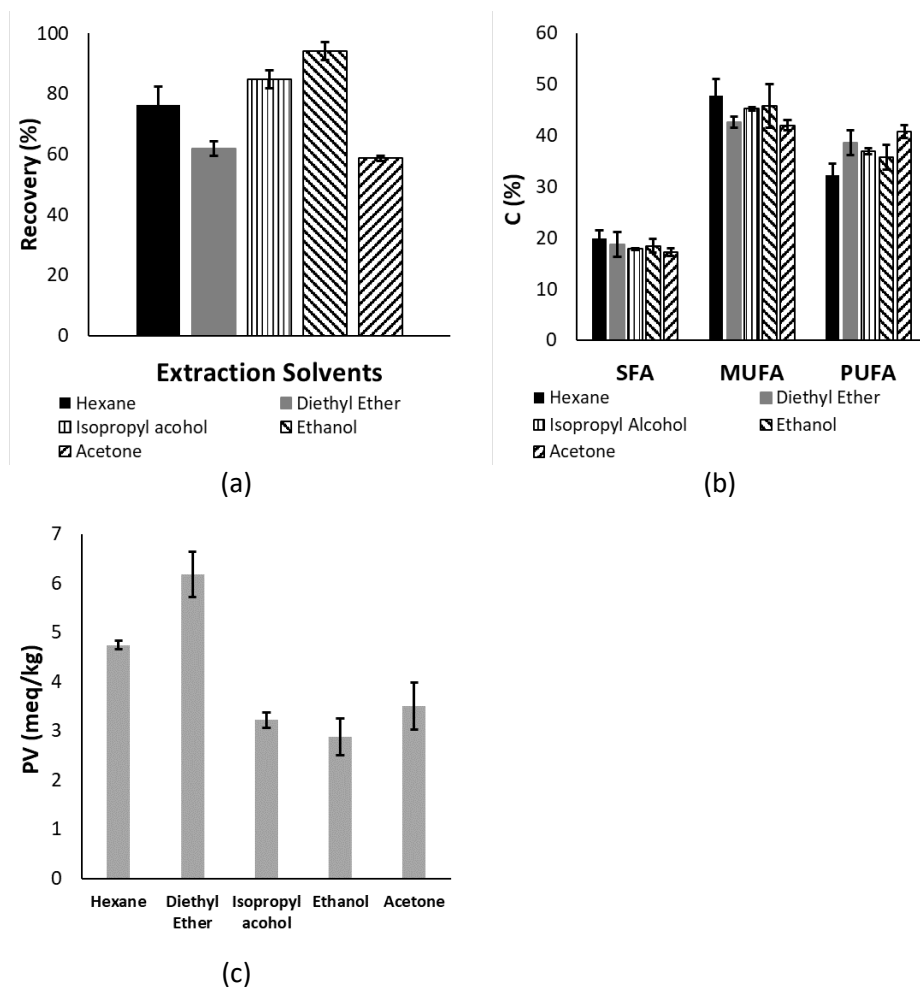

**Figure S1.** (a) Total oil recovery, (b) fatty acids composition and (c) peroxide values of lipids extracted with different solvents from sea bass guts at 35°C and 50:1 solvent to solid ratio
